# Supplementary material
Source: publisher site journal article supplement (https://www.dovepress.com/article/429323)
Supplement: Supplementary file 1 [file get_supplementary_file.php]

**Supplementary file:** Searching strategy

| **Database** | **Keyword** | **Hit** | **Date** |
| --- | --- | --- | --- |
| PubMed | ((“Aged” OR “Elderly” OR “Older Adult” OR “Elder” OR “Geriatric” OR “Elderly People” OR “Old People” OR “Senior”) AND (“Palliative Care” OR “End of Life Care” OR “Hospice Care” OR “Palliative Treatment” OR “Palliative Treatments” OR “Palliative Therapy” OR “Palliative Supportive Care” OR “Palliative Surgery” OR “Terminal Care”) | 719 | 30 April 2023 |
| EBSCO (CINAHL) | Round 1: ( aged or elderly or senior or older people or geriatric or elderly people ) AND ( palliative care or end of life care or terminal care or hospice care or hospice or palliative ) | 9,048 | 30 April 2023 |
| Round 2: ( aged or elderly or senior or older people or geriatric or elderly people ) AND ( palliative care or end of life care or terminal care or hospice care or hospice or palliative ) LIMIT TO: full text; academic journal; 10 years. | 2,431 | 30 April 2023 |
| Scopus | Round 1: Aged OR Elder* OR “Older Adult*” OR Geriatric* OR “Elderly People” OR “Old People” OR Senior AND “Palliative Care” OR “End of Life Care” OR “Hospice Care” OR “Palliative Treatment*” OR “Palliative Therapy” OR “Palliative Supportive Care” OR “Palliative Surgery” OR “Terminal Care” | 53,314 | 30 April 2023 |
| Round 2: Aged OR Elder* OR “Older Adult*” OR Geriatric* OR “Elderly People” OR “Old People” OR Senior AND “Palliative Care” OR “End of Life Care” OR “Hospice Care” OR “Palliative Treatment*” OR “Palliative Therapy” OR “Palliative Supportive Care” OR “Palliative Surgery” OR “Terminal Care” Limit to: 2023-2023; Subject Medicine-Nursing-psychology-health professional-multidisciplinary; Article only; Source limited to journal; all-open-access | 10,048 | 30 April 2023 |
| **Total** | | 13,198 | 30 April 2023 |
